# Supplementary material for: Enhanced detection of aromatic oxidation products using NO3− chemical ionization mass spectrometry with limited nitric acid
Source: Royal Society of Chemistry journal article supplement (doi:10.1039/d4ea00087k), 2024-01-01
Supplement: d4ea00087k1.pdf [file d4ea00087k1.pdf]

## Supplementary Information for

### Enhanced detection of aromatic oxidation products using $\text{NO}_3^-$ chemical ionization mass spectrometry with limited nitric acid

Olga Garmash<sup>1,2\*</sup>, Avinash Kumar<sup>1</sup>, Sakshi Jha<sup>1</sup>, Shawon Barua<sup>1</sup>, Noora Hyttinen<sup>3</sup>, Siddharth Iyer<sup>1</sup>, Matti Rissanen<sup>1,4\*</sup>

<sup>1</sup>Aerosol Physics Laboratory, Physics Unit, Faculty of Engineering and Natural Sciences, Tampere University, FI-33720, Tampere, Finland

<sup>2</sup>Department of Chemistry, University of Copenhagen, DK-2100, Copenhagen, Denmark

<sup>3</sup>Atmospheric Research Centre of Eastern Finland, Finnish Meteorological Institute, FI-70211, Kuopio, Finland

<sup>4</sup>Department of Chemistry, University of Helsinki, FI-00014, Helsinki, Finland

\*corresponding authors

**This file includes**

**Figures S1-S4**

**Tables S1-S4**

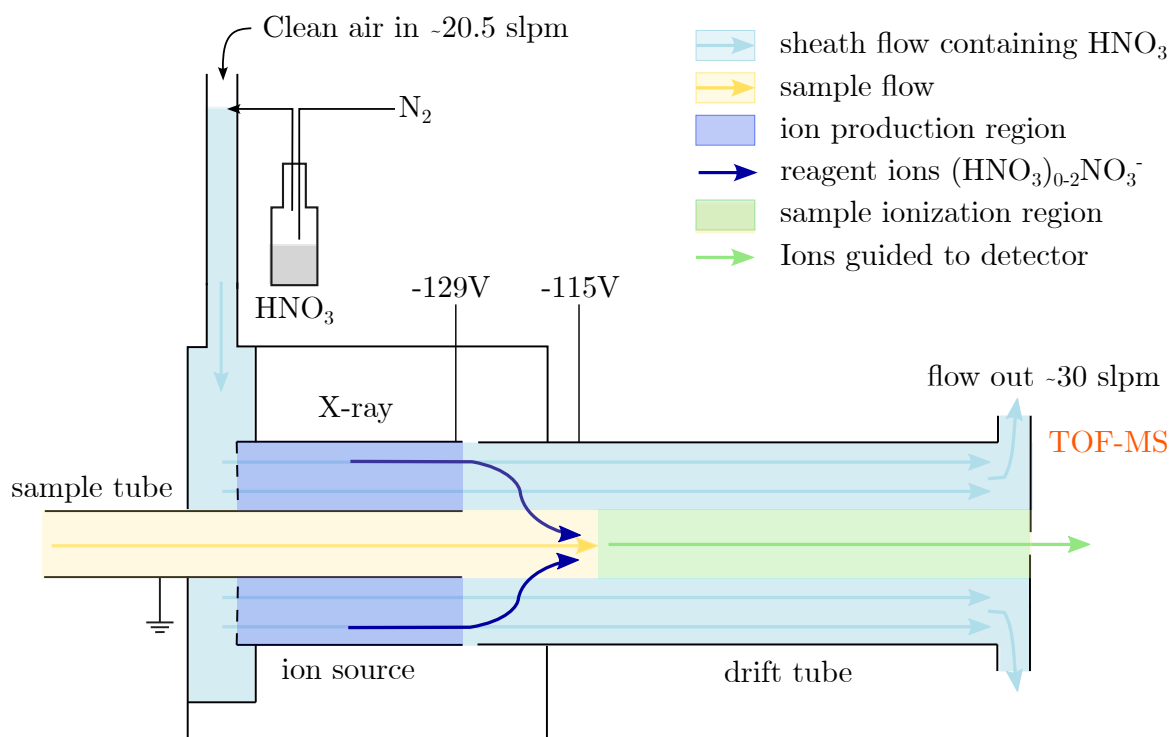

**Figure S1.** The schematic of Eisele-type nitrate ion chemical ionization inlet. Indicated values for flows and voltages correspond to the ones used in this study. Two regions where HNO<sub>3</sub> concentration can affect instrumental sensitivity are the ion production region and the sample ionization region. The flows in this schematic are approximated as ideal. In real conditions, some diffusion of neutral HNO<sub>3</sub> from the sheath flow into the sample ionization region may happen.

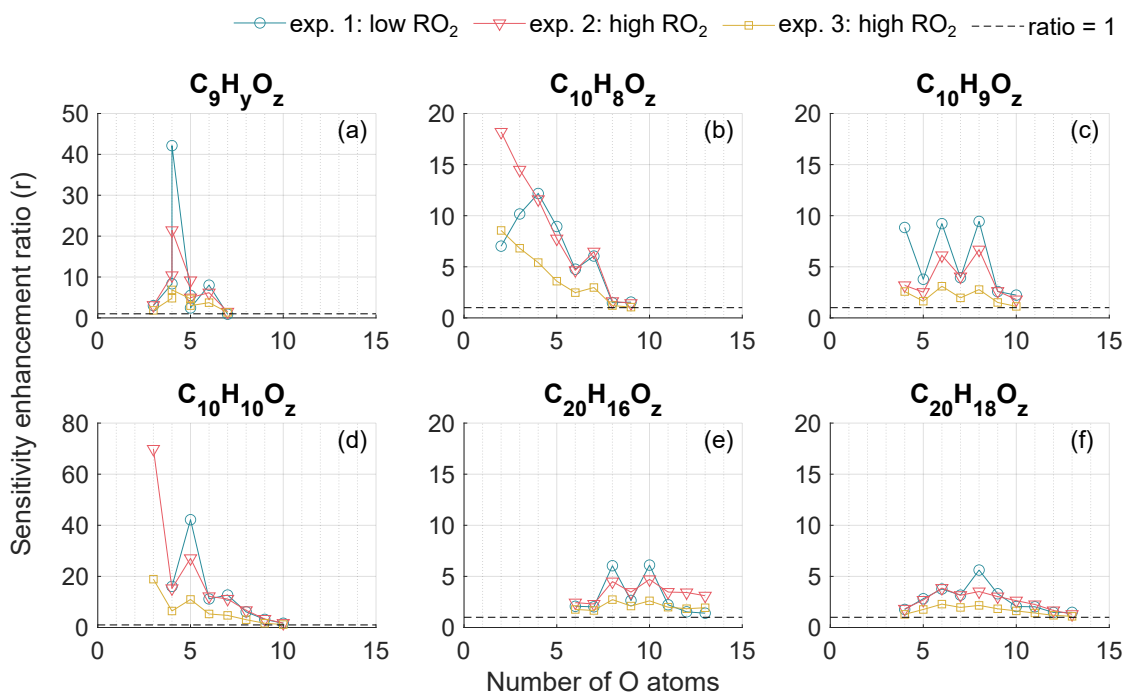

**Figure S2.** Enhancement in sensitivity for different product groups as function of number of oxygen atoms in the molecule in naphthalene oxidation experiments (exp. 1-3). Panels (a)-(d) show monomers and panels (e)-(f) show accretion products.

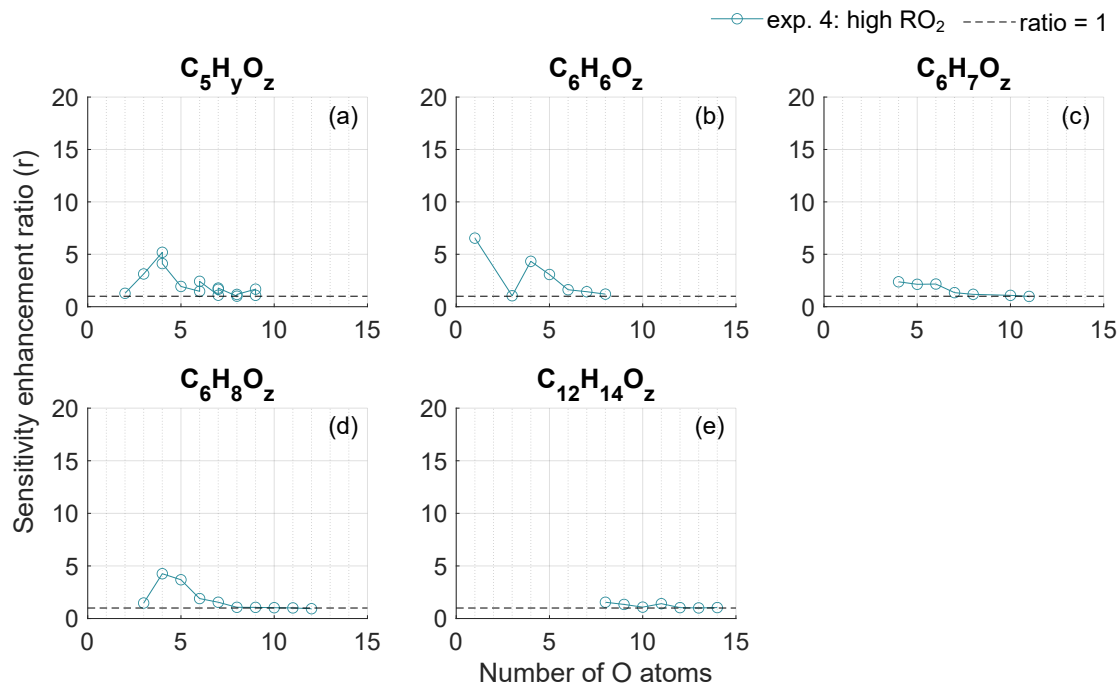

**Figure S3.** Enhancement in sensitivity for different molecular groups in benzene oxidation experiment (exp. 4).

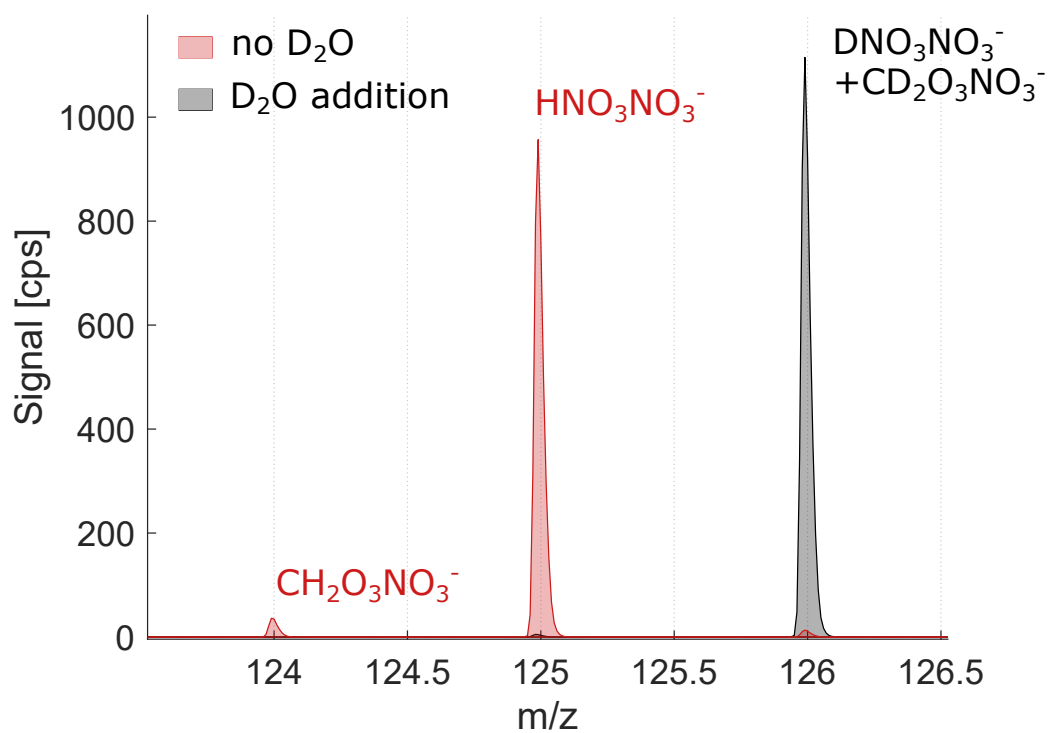

**Figure S4.** D<sub>2</sub>O addition in naphthalene oxidation experiment (exp. 5) displays full conversion of HNO<sub>3</sub>NO<sub>3</sub><sup>-</sup> to DNO<sub>3</sub>NO<sub>3</sub><sup>-</sup>. The increase in signal at m/z 126 as compared to m/z 125 is likely due to simultaneous conversion of carbonic acid.

**Table S1.** Signals (counts per second) for each detected product in naphthalene experiments 1-3. 0/1 indicate the nitric acid flow settings (1=flow on 10 sccm, 0=flow off). All ions are charged negatively and reagent ion NO<sub>3</sub> is included into the formula.

| Exact mass m/z | Ion composition | Exp 1, 0 | Exp 1, 1 | Exp 2, 0 | Exp 2, 1 | Exp 3, 0 | Exp 3, 1 |
|----------------|-----------------|----------|----------|----------|----------|----------|----------|
| 222.0408       | C10H8N1O5       | 0.76     | 0.11     | 2.42     | 0.13     | 2.59     | 0.30     |
| 226.0357       | C9H8N1O6        | 0.28     | 0.09     | 1.61     | 0.52     | 1.97     | 1.07     |
| 238.0357       | C10H8N1O6       | 1.63     | 0.16     | 30.63    | 2.11     | 36.23    | 5.32     |
| 240.015        | C9H6N1O7        | 0.63     | 0.08     | 3.06     | 0.29     | 3.85     | 0.80     |
| 240.0514       | C10H10N1O6      | 1.22     | 0.00     | 20.06    | 0.29     | 25.57    | 1.35     |
| 242.0306       | C9H8N1O7        | 0.88     | 0.02     | 11.99    | 0.56     | 15.22    | 2.22     |
| 242.067        | C10H12N1O6      | 0.09     | 0.03     | 0.00     | 0.07     | 0.30     | 0.02     |
| 254.0306       | C10H8N1O7       | 2.07     | 0.17     | 23.50    | 2.03     | 29.36    | 5.42     |
| 255.0385       | C10H9N1O7       | 0.26     | 0.03     | 1.40     | 0.44     | 1.57     | 0.61     |
| 256.0463       | C10H10N1O7      | 4.67     | 0.29     | 83.59    | 5.46     | 105.40   | 16.33    |
| 258.0255       | C9H8N1O8        | 0.35     | 0.06     | 5.08     | 0.55     | 6.13     | 1.31     |
| 260.0412       | C9H10N1O8       | 0.22     | 0.09     | 1.79     | 0.36     | 2.11     | 0.70     |
| 270.0255       | C10H8N1O8       | 4.61     | 0.52     | 71.71    | 9.25     | 87.19    | 24.28    |
| 271.0334       | C10H9N1O8       | 1.33     | 0.35     | 4.98     | 1.98     | 5.52     | 3.38     |
| 272.0412       | C10H10N1O8      | 9.71     | 0.23     | 125.20   | 4.63     | 157.82   | 14.37    |
| 274.0204       | C9H8N1O9        | 3.45     | 0.43     | 51.57    | 8.35     | 60.34    | 16.18    |
| 286.0204       | C10H8N1O9       | 3.43     | 0.72     | 44.05    | 9.46     | 53.17    | 21.51    |
| 287.0283       | C10H9N1O9       | 1.62     | 0.18     | 5.87     | 0.96     | 5.46     | 1.76     |
| 288.0361       | C10H10N1O9      | 2.37     | 0.21     | 86.17    | 7.08     | 106.16   | 20.04    |
| 290.0154       | C9H8N1O10       | 0.35     | 0.39     | 12.86    | 8.66     | 15.57    | 11.59    |
| 290.0518       | C10H12N1O9      | 0.52     | 0.14     | 6.22     | 2.47     | 9.35     | 5.50     |
| 302.0154       | C10H8N1O10      | 13.44    | 2.22     | 294.32   | 45.45    | 343.83   | 115.69   |
| 303.0232       | C10H9N1O10      | 0.72     | 0.18     | 3.54     | 0.88     | 4.03     | 2.06     |
| 304.031        | C10H10N1O10     | 6.15     | 0.48     | 144.67   | 12.94    | 168.77   | 35.62    |
| 318.0103       | C10H8N1O11      | 0.78     | 0.52     | 18.94    | 11.65    | 23.87    | 19.76    |
| 319.0181       | C10H9N1O11      | 8.47     | 0.90     | 23.98    | 3.59     | 21.54    | 7.77     |
| 320.0259       | C10H10N1O11     | 2.72     | 0.44     | 70.33    | 10.48    | 81.02    | 26.56    |
| 334.0052       | C10H8N1O12      | 3.58     | 2.32     | 44.13    | 30.81    | 46.76    | 44.40    |
| 335.013        | C10H9N1O12      | 1.56     | 0.60     | 4.23     | 1.62     | 4.31     | 2.85     |
| 336.0208       | C10H10N1O12     | 4.68     | 1.47     | 65.50    | 19.63    | 70.33    | 42.35    |
| 351.0079       | C10H9N1O13      | 2.81     | 1.26     | 6.04     | 3.36     | 5.54     | 4.93     |
| 352.0158       | C10H10N1O13     | 1.45     | 0.87     | 18.28    | 10.67    | 19.49    | 16.83    |
| 384.1089       | C20H18N1O7      | 18.50    | 10.48    | 157.49   | 86.38    | 200.91   | 156.29   |
| 400.1038       | C20H18N1O8      | 3.63     | 1.29     | 82.87    | 30.79    | 103.68   | 58.76    |
| 414.0831       | C20H16N1O9      | 0.23     | 0.11     | 3.86     | 1.59     | 4.90     | 2.78     |
| 416.0987       | C20H18N1O9      | 24.45    | 6.50     | 221.31   | 57.38    | 269.13   | 117.74   |
| 430.078        | C20H16N1O10     | 0.10     | 0.05     | 2.56     | 1.11     | 3.21     | 1.93     |
| 432.0936       | C20H18N1O10     | 3.80     | 1.20     | 98.34    | 31.13    | 114.63   | 58.40    |
| 446.0729       | C20H16N1O11     | 0.36     | 0.06     | 4.72     | 1.05     | 5.14     | 1.88     |
| 448.0885       | C20H18N1O11     | 3.72     | 0.66     | 51.92    | 14.76    | 62.30    | 28.80    |
| 450.0678       | C19H16N1O12     | 0.55     | 0.28     | 9.50     | 5.73     | 10.97    | 8.68     |
| 462.0678       | C20H16N1O12     | 0.17     | 0.07     | 4.65     | 1.34     | 5.28     | 2.52     |
| 464.0834       | C20H18N1O12     | 4.36     | 1.32     | 95.28    | 31.48    | 106.73   | 58.25    |
| 478.0627       | C20H16N1O13     | 0.29     | 0.05     | 3.77     | 0.80     | 3.98     | 1.53     |

|                 |             |      |      |       |       |       |       |
|-----------------|-------------|------|------|-------|-------|-------|-------|
| <b>480.0784</b> | C20H18N1O13 | 0.77 | 0.37 | 29.05 | 11.06 | 33.21 | 20.44 |
| <b>494.0576</b> | C20H16N1O14 | 0.10 | 0.04 | 3.18  | 0.92  | 3.48  | 1.75  |
| <b>496.0733</b> | C20H18N1O14 | 2.32 | 1.15 | 38.28 | 17.00 | 40.21 | 28.49 |
| <b>510.0526</b> | C20H16N1O15 | 0.05 | 0.03 | 1.37  | 0.40  | 1.55  | 0.84  |
| <b>512.0682</b> | C20H18N1O15 | 0.31 | 0.21 | 10.43 | 6.26  | 11.11 | 9.31  |
| <b>526.0475</b> | C20H16N1O16 | 0.05 | 0.04 | 0.81  | 0.26  | 0.83  | 0.43  |
| <b>528.0631</b> | C20H18N1O16 | 0.61 | 0.41 | 7.20  | 5.54  | 7.38  | 6.76  |

**Table S2.** Signals (counts per second) for trimer and tetramer accretion products in naphthalene experiment 2 (Figure 9). 0/1 indicate the nitric acid flow settings (1=flow on 10 sccm, 0=flow off). All ions are charged negatively and reagent ion NO<sub>3</sub> is included into the formula.

| <b>Exact mass m/z</b> | <b>Ion composition</b> | <b>Exp 2, 0</b> | <b>Exp 2, 1</b> |
|-----------------------|------------------------|-----------------|-----------------|
| <b>562.1719</b>       | C30H28N1O10            | 0.78            | 0.11            |
| <b>576.1511</b>       | C30H26N1O11            | 1.59            | 0.30            |
| <b>578.1668</b>       | C30H28N1O11            | 1.80            | 0.23            |
| <b>592.1461</b>       | C30H26N1O12            | 2.25            | 0.40            |
| <b>594.1617</b>       | C30H28N1O12            | 3.43            | 0.33            |
| <b>608.141</b>        | C30H26N1O13            | 2.76            | 0.44            |
| <b>610.1566</b>       | C30H28N1O13            | 4.22            | 0.58            |
| <b>624.1359</b>       | C30H26N1O14            | 3.41            | 0.74            |
| <b>626.1516</b>       | C30H28N1O14            | 4.07            | 0.47            |
| <b>640.1308</b>       | C30H26N1O15            | 2.04            | 0.46            |
| <b>642.1464</b>       | C30H28N1O15            | 2.75            | 0.44            |
| <b>656.1257</b>       | C30H26N1O16            | 2.19            | 0.55            |
| <b>658.1414</b>       | C30H28N1O16            | 1.74            | 0.32            |
| <b>672.1206</b>       | C30H26N1O17            | 0.93            | 0.31            |
| <b>674.1363</b>       | C30H28N1O17            | 1.03            | 0.33            |
| <b>690.1312</b>       | C30H28N1O18            | 0.73            | 0.25            |
| <b>704.1105</b>       | C30H26N1O19            | 0.35            | 0.13            |
| <b>706.2294</b>       | C40H36N1O11            | 0.62            | 0.25            |
| <b>722.2243</b>       | C40H36N1O12            | 0.57            | 0.21            |
| <b>738.2192</b>       | C40H36N1O13            | 1.70            | 0.46            |
| <b>754.2141</b>       | C40H36N1O14            | 1.35            | 0.39            |
| <b>770.209</b>        | C40H36N1O15            | 1.77            | 0.43            |
| <b>786.204</b>        | C40H36N1O16            | 1.05            | 0.36            |
| <b>802.1989</b>       | C40H36N1O17            | 0.62            | 0.24            |
| <b>818.1938</b>       | C40H36N1O18            | 0.57            | 0.20            |
| <b>834.1887</b>       | C40H36N1O19            | 0.27            | 0.10            |

**Table S3.** Signals (counts per second) for each detected product in benzene experiment (exp. 4). 0/1 indicate the nitric acid flow settings (1=flow on 10 sccm, 0=flow off). All ions are charged negatively and reagent ion NO<sub>3</sub> is included into the formula.

| Exact mass m/z | Ion composition                                                | Exp 4, 0 | Exp 4, 1 |
|----------------|----------------------------------------------------------------|----------|----------|
| 156.0302       | C <sub>6</sub> H <sub>6</sub> N <sub>1</sub> O <sub>4</sub>    | 0.77     | 0.12     |
| 160.0251       | C <sub>5</sub> H <sub>6</sub> N <sub>1</sub> O <sub>5</sub>    | 210.11   | 164.49   |
| 176.0201       | C <sub>5</sub> H <sub>6</sub> N <sub>1</sub> O <sub>6</sub>    | 12.73    | 4.08     |
| 188.0201       | C <sub>6</sub> H <sub>6</sub> N <sub>1</sub> O <sub>6</sub>    | 83.36    | 79.84    |
| 189.9993       | C <sub>5</sub> H <sub>4</sub> N <sub>1</sub> O <sub>7</sub>    | 12.43    | 2.40     |
| 190.0357       | C <sub>6</sub> H <sub>8</sub> N <sub>1</sub> O <sub>6</sub>    | 3.19     | 2.16     |
| 192.015        | C <sub>5</sub> H <sub>6</sub> N <sub>1</sub> O <sub>7</sub>    | 29.32    | 7.13     |
| 192.0514       | C <sub>6</sub> H <sub>10</sub> N <sub>1</sub> O <sub>6</sub>   | 0.39     | 0.11     |
| 204.015        | C <sub>6</sub> H <sub>6</sub> N <sub>1</sub> O <sub>7</sub>    | 84.05    | 19.42    |
| 205.0228       | C <sub>6</sub> H <sub>7</sub> N <sub>1</sub> O <sub>7</sub>    | 6.25     | 2.63     |
| 206.0306       | C <sub>6</sub> H <sub>8</sub> N <sub>1</sub> O <sub>7</sub>    | 240.34   | 56.40    |
| 208.0099       | C <sub>5</sub> H <sub>6</sub> N <sub>1</sub> O <sub>8</sub>    | 19.30    | 10.00    |
| 220.0099       | C <sub>6</sub> H <sub>6</sub> N <sub>1</sub> O <sub>8</sub>    | 46.46    | 15.13    |
| 221.0177       | C <sub>6</sub> H <sub>7</sub> N <sub>1</sub> O <sub>8</sub>    | 2.60     | 1.22     |
| 222.0255       | C <sub>6</sub> H <sub>8</sub> N <sub>1</sub> O <sub>8</sub>    | 329.39   | 89.36    |
| 224.0048       | C <sub>5</sub> H <sub>6</sub> N <sub>1</sub> O <sub>9</sub>    | 32.56    | 22.17    |
| 224.0412       | C <sub>6</sub> H <sub>10</sub> N <sub>1</sub> O <sub>8</sub>   | 0.95     | 0.94     |
| 226.0205       | C <sub>5</sub> H <sub>8</sub> N <sub>1</sub> O <sub>9</sub>    | 21.00    | 8.67     |
| 236.0048       | C <sub>6</sub> H <sub>6</sub> N <sub>1</sub> O <sub>9</sub>    | 19.85    | 12.26    |
| 237.0126       | C <sub>6</sub> H <sub>7</sub> N <sub>1</sub> O <sub>9</sub>    | 1.77     | 0.82     |
| 238.0205       | C <sub>6</sub> H <sub>8</sub> N <sub>1</sub> O <sub>9</sub>    | 92.92    | 48.95    |
| 239.9997       | C <sub>5</sub> H <sub>6</sub> N <sub>1</sub> O <sub>10</sub>   | 30.94    | 28.27    |
| 241.0075       | C <sub>5</sub> H <sub>7</sub> N <sub>1</sub> O <sub>10</sub>   | 3.59     | 2.16     |
| 242.0154       | C <sub>5</sub> H <sub>8</sub> N <sub>1</sub> O <sub>10</sub>   | 20.79    | 11.71    |
| 251.9997       | C <sub>6</sub> H <sub>6</sub> N <sub>1</sub> O <sub>10</sub>   | 11.91    | 8.33     |
| 253.0075       | C <sub>6</sub> H <sub>7</sub> N <sub>1</sub> O <sub>10</sub>   | 2.66     | 1.99     |
| 254.0154       | C <sub>6</sub> H <sub>8</sub> N <sub>1</sub> O <sub>10</sub>   | 45.13    | 29.13    |
| 255.9946       | C <sub>5</sub> H <sub>6</sub> N <sub>1</sub> O <sub>11</sub>   | 62.43    | 62.16    |
| 258.0103       | C <sub>5</sub> H <sub>8</sub> N <sub>1</sub> O <sub>11</sub>   | 6.04     | 5.16     |
| 267.9946       | C <sub>6</sub> H <sub>6</sub> N <sub>1</sub> O <sub>11</sub>   | 19.51    | 16.27    |
| 269.0025       | C <sub>6</sub> H <sub>7</sub> N <sub>1</sub> O <sub>11</sub>   | 3.16     | 2.68     |
| 270.0103       | C <sub>6</sub> H <sub>8</sub> N <sub>1</sub> O <sub>11</sub>   | 94.86    | 88.87    |
| 271.9896       | C <sub>5</sub> H <sub>6</sub> N <sub>1</sub> O <sub>12</sub>   | 12.59    | 7.52     |
| 274.0052       | C <sub>5</sub> H <sub>8</sub> N <sub>1</sub> O <sub>12</sub>   | 4.18     | 3.85     |
| 286.0052       | C <sub>6</sub> H <sub>8</sub> N <sub>1</sub> O <sub>12</sub>   | 39.21    | 36.95    |
| 300.9923       | C <sub>6</sub> H <sub>7</sub> N <sub>1</sub> O <sub>13</sub>   | 3.23     | 2.99     |
| 302.0001       | C <sub>6</sub> H <sub>8</sub> N <sub>1</sub> O <sub>13</sub>   | 26.01    | 25.25    |
| 316.9872       | C <sub>6</sub> H <sub>7</sub> N <sub>1</sub> O <sub>14</sub>   | 2.97     | 3.03     |
| 317.995        | C <sub>6</sub> H <sub>8</sub> N <sub>1</sub> O <sub>14</sub>   | 8.61     | 8.52     |
| 333.9899       | C <sub>6</sub> H <sub>8</sub> N <sub>1</sub> O <sub>15</sub>   | 5.81     | 6.23     |
| 348.0572       | C <sub>12</sub> H <sub>14</sub> N <sub>1</sub> O <sub>11</sub> | 65.33    | 42.18    |
| 364.0522       | C <sub>12</sub> H <sub>14</sub> N <sub>1</sub> O <sub>12</sub> | 20.24    | 15.09    |
| 380.0471       | C <sub>12</sub> H <sub>14</sub> N <sub>1</sub> O <sub>13</sub> | 10.17    | 9.39     |
| 396.042        | C <sub>12</sub> H <sub>14</sub> N <sub>1</sub> O <sub>14</sub> | 10.66    | 7.55     |
| 412.0369       | C <sub>12</sub> H <sub>14</sub> N <sub>1</sub> O <sub>15</sub> | 15.29    | 14.76    |

|                 |             |      |      |
|-----------------|-------------|------|------|
| <b>428.0318</b> | C12H14N1O16 | 4.47 | 4.44 |
| <b>444.0267</b> | C12H14N1O17 | 5.15 | 4.95 |

**Table S4.** Regression analysis coefficients presented in Figure 6 of the main text. *r* is the sensitivity enhancement ratio, O:C is oxygen-to-carbon ratio, OSc is oxidation state of carbon, C\* is saturation vapor concentration, and nO is number of oxygen atoms (see Methods in main text for more details).

|                  | <b>Exp.</b> | <b>VOC</b> | <b>Linear model</b>     | <b>y</b> | <b>x</b>         | <b>a</b> | <b>b</b> | <b>R<sup>2</sup></b> |
|------------------|-------------|------------|-------------------------|----------|------------------|----------|----------|----------------------|
| <b>Figure 6a</b> | 2           | npt        | $\log_{10}(y) = ax + b$ | <i>r</i> | O:C              | -0.59    | 0.97     | 0.10                 |
|                  | 4           | ben        | $\log_{10}(y) = ax + b$ | <i>r</i> | O:C              | -0.31    | 0.55     | 0.36                 |
| <b>Figure 6b</b> | 2           | npt        | $\log_{10}(y) = ax + b$ | <i>r</i> | OSc              | -0.33    | 0.72     | 0.12                 |
|                  | 4           | ben        | $\log_{10}(y) = ax + b$ | <i>r</i> | OSc              | -0.15    | 0.36     | 0.33                 |
| <b>Figure 6c</b> | 2           | npt        | $\log_{10}(y) = ax + b$ | <i>r</i> | $\log_{10}(C^*)$ | 0.035    | 0.89     | 0.37                 |
|                  | 4           | ben        | $\log_{10}(y) = ax + b$ | <i>r</i> | $\log_{10}(C^*)$ | 0.027    | 0.27     | 0.43                 |
| <b>Figure 6d</b> | 2           | npt        | $\log_{10}(y) = ax + b$ | <i>r</i> | nO               | -0.08    | 1.22     | 0.36                 |
|                  | 4           | ben        | $\log_{10}(y) = ax + b$ | <i>r</i> | nO               | -0.05    | 0.58     | 0.48                 |
